# Supplementary material for: Chondroitin Sulfate Protects the Liver in an Experimental Model of Extra-Hepatic Cholestasis Induced by Common Bile Duct Ligation
Source: MDPI journal article supplement (doi:10.3390/molecules27030654), 2022-01-20
Supplement: s1 [file s1]

*Supplementary File*

# **Chondroitin Sulfate Protects the Liver in an Experimental Model of Extra-Hepatic Cholestasis Induced by Common Bile Duct Ligation**

Pedro L. R. Guedes <sup>1</sup>, Carolina P. F. Carvalho <sup>2</sup>, Adriana A. F. Carbonel <sup>3</sup>, Manuel J. Simões <sup>4</sup>, Marcelo Y. Icimoto <sup>5</sup>,  
Jair A. K. Aguiar <sup>6</sup>, Maria Kouyoumdjian <sup>7</sup>, Marcos L. Gazarini <sup>2</sup> and Marcia R. Nagaoka <sup>2,\*</sup>

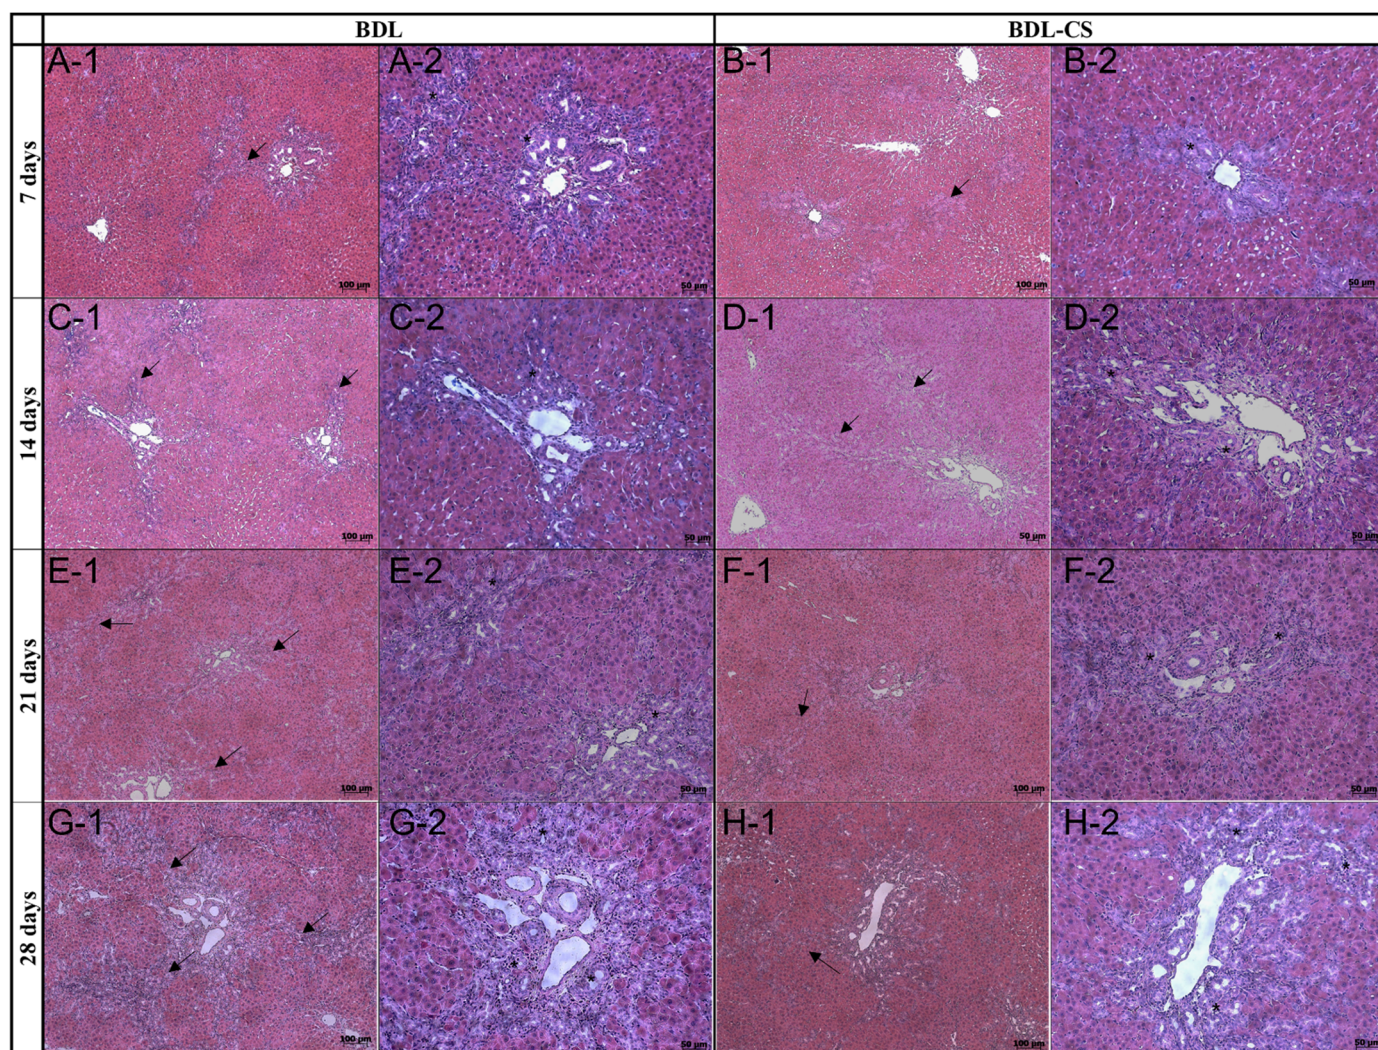

**Figure S1.** Liver histology of BDL animals treated with vehicle (BDL group) or chondroitin sulfate (BDL-CS groups). (A–H) Representative images of the hematoxylin-eosin-stained liver sections from BDL and BDL-CS groups (1–100× magnification and 2–200× magnification; scale bar: 100 μm and 50 μm, respectively). The arrows indicate the porto-portal bridging formation and the asterisks the bile ductular proliferation.
